# Supplementary material
Source: publisher site journal article supplement (https://www.dovepress.com/article/289355)
Supplement: Supplementary file 1 [file get_supplementary_file.php]

SUPPLEMENTARY DATA

Eduarda Fernandes et al

**Lipid nanosystems and serum protein as biomimetic interfaces: predicting the biodistribution of a caffeic acid-based antioxidant**

Eduarda Fernandes1, Sofia Benfeito2, Fernando Cagide2, Hugo Gonçalves3, Sigrid Bernstorff4, Jana B. Nieder5, M. Elisabete C.D. Real Oliveira1, Fernanda Borges2 and Marlene Lúcio1,6


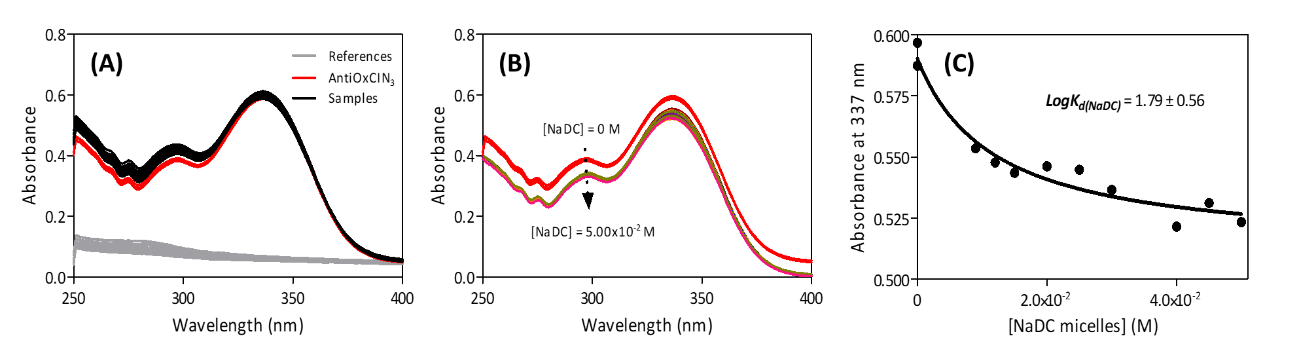


**Figure S1 -** Schematic representation of the derivative spectrophotometric determination of AntiOxCIN3 distribution coefficient in NaDC micelles as biliary salts model systems: **(A)** AntiOxCIN3 (2.0×10-4 M) absorption spectra in aqueous buffered phase pH=7.4 (red spectrum) and after incubation with increasing concentrations of NaDC micelles (0 - 5.0×10-2 M) (black spectra) or absorption spectra of NaDC micelles (0 - 5.0×10-2 M) in the absence of AntiOxCIN3 (grey spectra - references); **(B)** Resultant spectra after NaDC references subtraction; **(C)** Non-linear fitting by Equation 1 of derivative absorbance at λ=337 nm as a function of NaDC micelles concentration.


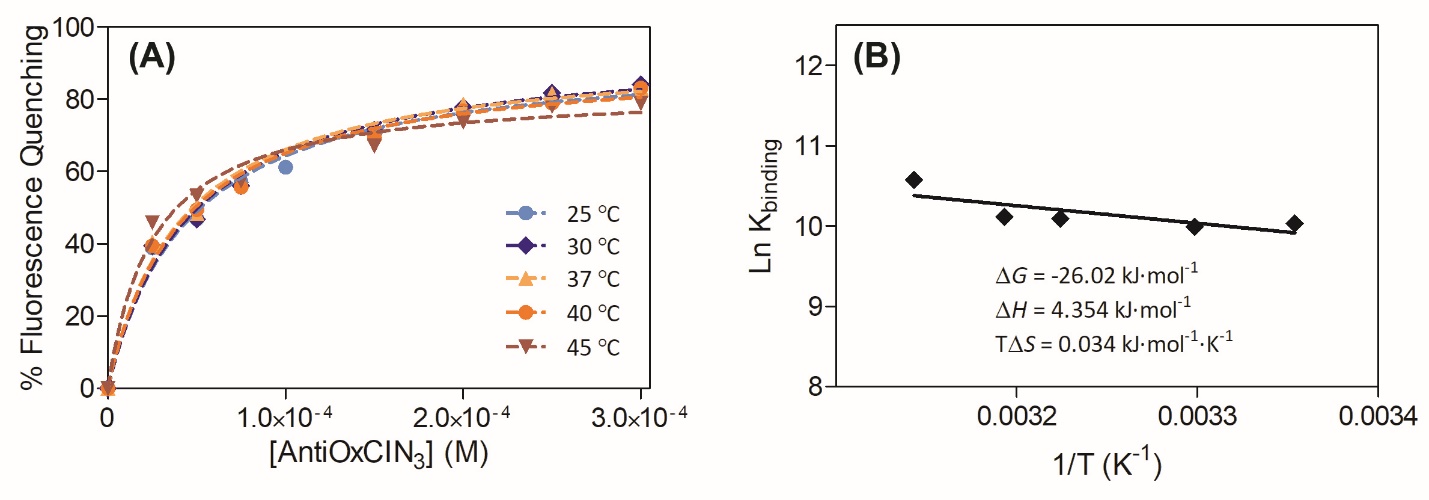


**Figure S2 - (A)** Graphical representation of HSA (2.0×10-2 M) percentage of fluorescence quenching promoted by increasing concentrations of AntiOxCIN3 (0 to 3.50×10-4 M), at several temperatures represented with different colors (see legend), including the non-linear fitting with Equation 6 (dashed colored lines). **(B)** Graphical representation of the linear van’t Hoff relation and thermodynamic parameters obtained (Equation 9 and 10).

**Table S1 -** Distribution coefficient of AntiOxCIN3 in PC membrane model system (*LogKd(PC)*) at different pH values. The values presented are mean ± standard deviation of at least three independent experiments.

|  | ***LogKd(PC)*** |
| --- | --- |
| **pH 2.0** | 3.98 ± 0.22 |
| **pH 3.0** | 3.93 ± 0.43 |
| **pH 4.0** | 3.98 ± 0.63 |
| **pH 5.0** | 3.02 ± 0.14 |
| **pH 6.0** | 3.46 ± 0.25 |

**Table S2 -** Thermodynamic parameters of AntiOxCIN3 distribution in PC membrane system.

| **Temperature (˚C)** | | ***LogKd(PC)*** | **ΔHaq→mem (KJ∙mol-1)** | **TΔSaq→mem (KJ∙mol-1)** |
| --- | --- | --- | --- | --- |
| **Lβ phase** | 30.0 | 3.40 ± 0.12 | -14.92 | 0.012 |
| 33.0 | 3.36 ± 0.15 |
| 37.0 | 3.34 ± 0.02 |
| **Lα phase** | 40.0 | 3.35 ± 0.05 | 43.93 | 0.200 |
| 45.0 | 3.52 ± 0.04 |

**Table S3 -** Stern-Volmer constant (*KSV*) obtained from measurements of fluorescence quenching of *n*-AS by AntiOxCIN3 in PC membrane system.

| **Probe** | **Temperature (ºC)** | **Ksv (M-1)** |
| --- | --- | --- |
| 3-AS | 30 | 13.30 |
| 37 | 11.25 |
| 45 | 9.85 |
| 6-AS | 30 | 2.30 |
| 37 | 1.54 |
| 45 | 1.20 |
| 9-AS | 30 | 3.21 |
| 37 | 2.99 |
| 45 | 1.83 |
| 12-AS | 30 | 3.12 |
| 37 | 2.90 |
| 45 | 1.76 |


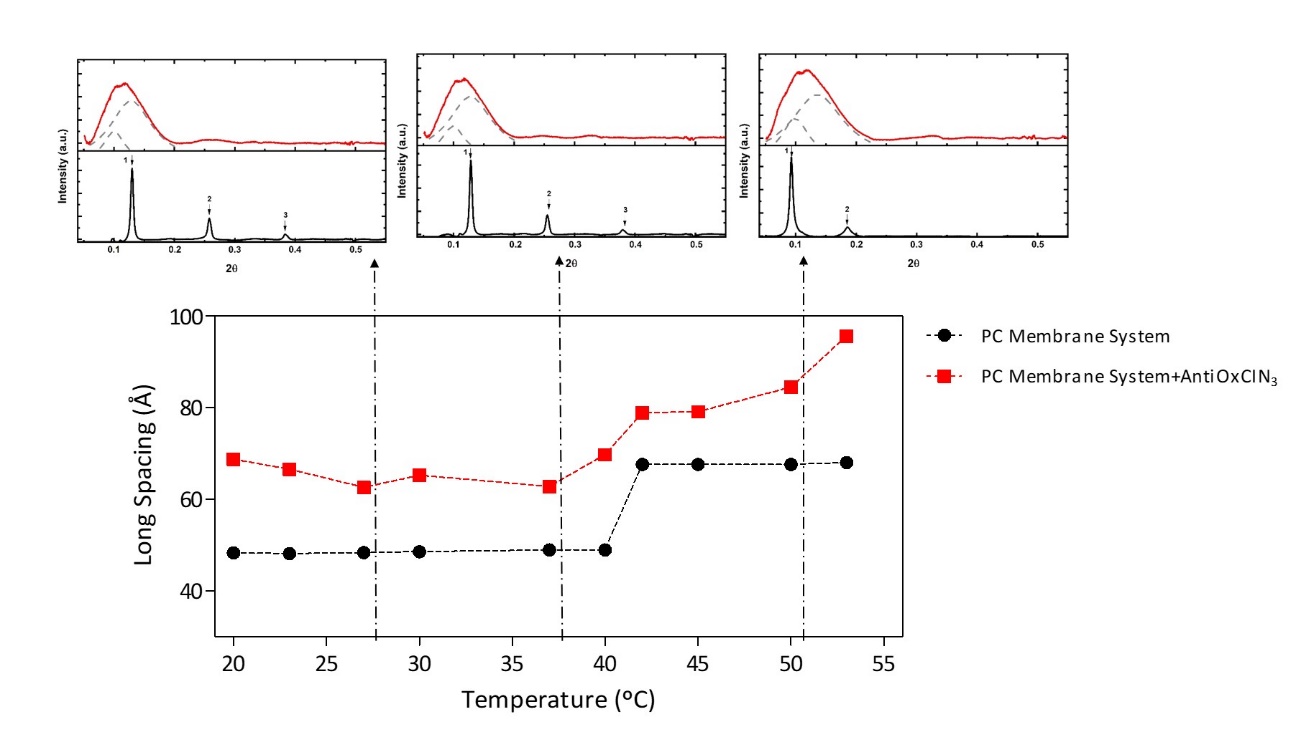


**Figure S3 -** Graphical representation of long spacing (*dL*) as a function of temperature obtained from SAXS patterns in the absence (black) and presence of AntiOxCIN3 (red). The insets represent the SAXS patterns of PC membrane model in the absence (solid black lines) and in the presence of AntiOxCIN3 (solid red lines) in the gel (27˚C), ripple gel (37˚C) and fluid (50˚C) phases (ordered from left to right). Dashed grey lines give the best fit of the Lorentzian’s analysis model to the scattered intensities.


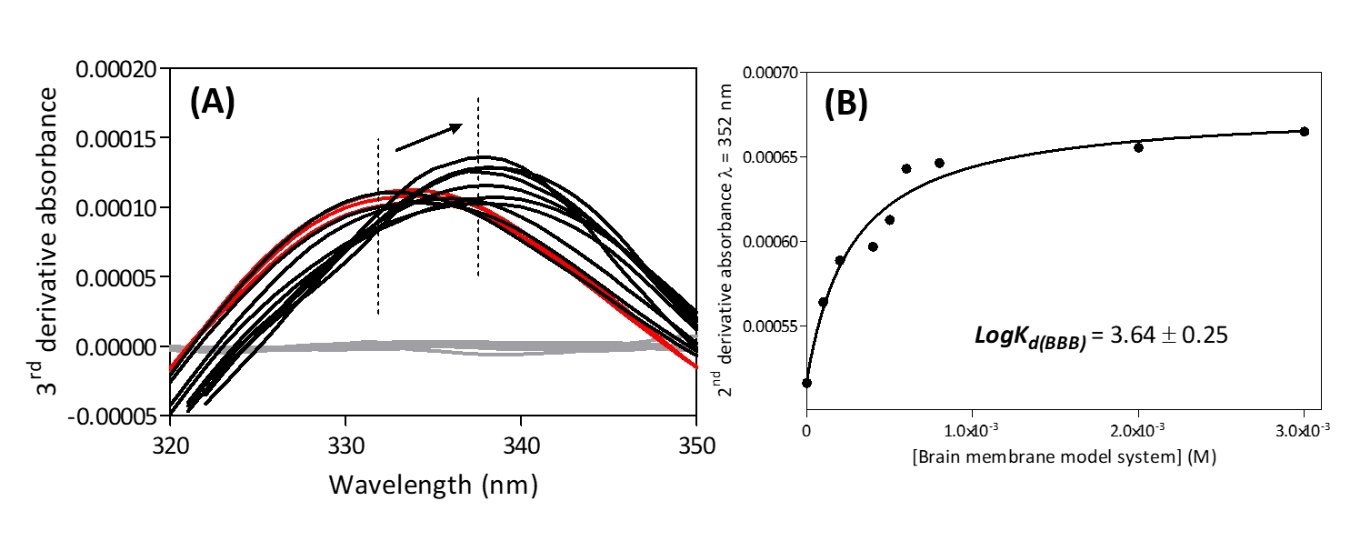


**Figure S4 -** Schematic representation of BBB membrane model system partition coefficient of AntiOxCIN3 (2.0×10-4 M) by derivative spectrophotometry: **(A)** A section of the third derivative of the absorbance spectra of AntiOxCIN3 in aqueous buffered phase pH=7.4 (red spectrum), after incubation with increasing concentrations of BBB membrane model system (0- 3.0×10-3 M) prepared in the same conditions (black spectra) and increasing concentrations of BBB membrane model system (0- 3.0×10-3 M) in the absence of AntiOxCIN3 (grey spectra), highlighting the observed shift in the maximum peak with increasing membrane model concentrations; **(B)** Non-linear fitting by Equation 1 of derivative absorbance at λ=352 nm as a function of BBB membrane model system concentration.
